# Supplementary material for: Synthesis of a highly thermally stable octupolar polyimide for nonlinear optics.
Source: Royal Society of Chemistry journal article supplement (doi:10.1039/b108099g), 2001-10-30
Supplement: b108099g.doc [file b108099g.doc]

# Supplementary materials

Thomas Le Bouder,Olivier Maury, Hubert Le Bozec,* Isabelle Ledoux, and Joseph Zyss

**General.** All reactions were routinely performed under argon using Schlenk techniques. NMR spectra (1H, 31P, 19F) were recorded at room temperature on a BRUKER DPX 200 (operating at 200.12 MHz for 1H) spectrometer. UV-visible spectra were recorded on a KONTRON UVIKON 941 spectrophotometer in diluted dichloromethane solution (*ca*. 10-5 Mol.L-1). Infra-red spectra were recorded in KBr pellets using a Nicolet 205 FTIR. Thermal stability was measured by mean of a TA-instrument TGA 2050 Thermogravimetric Analyzer (TGA). The decomposition temperature at 5% weight loss is called Td5. The heating program used is the following: (i) isothermal at 50°C for 15 min, (ii) a temperature ramp of 10 °C.min-1 up to 600°C. Glass transition temperatures of the polymers were measured by Differential Scanning Calorimetry (DSC) using a TA-instrument DSC 2010 apparatus. The molecular weights and polydispersities (relative to polystyrene standards) were determined at room temperature in dilute THF solution using a Waters 600 gel permeation chromatograph (GPC) equipped with a Waters 996 photodiode red detector and a Waters 410 differential refractometer. High-resolution mass spectrometry measurements were performed at the Centre Regional de Mesures Physiques de l’Ouest (Rennes, France) and elemental analysis by the Service Central d’Analyse du CNRS (Solaize, France).

Atom numbering for bipyridyl ligands and related complexes is depicted as followed:

**4,4’-*p*-[(*N*-butyl-*N*-hydroxybutyl)aminostyryl]-2,2’-bipyridine** **1b.** To a THF solution (10 mL) of diisopropylamine (0.8 mL, 5.95 mmol) at -20°C was added nBuLi (1.6M in hexane, 3.7 mL, 5.95 mmol) *via* a syringe. The solution was then stirred for 15 min and a solution of 4,4’-dimethyl-[2,2’]-bipyridine (0.5 g, 2.7 mmol) in THF (30 mL) was added dropwise at -20°C. The red mixture was stirred for 2h. A solution of 5-(*N*-butyl,*N*-tetrahydropyranyloxybutyl)aminobenzaldehyde (1.8 g, 5.4 mmol) in THF (20 mL) was slowly added at -20°C. The resulting yellow-green solution was stirred for 2h at -20°C and then at room temperature overnight. After hydrolysis and extraction with dichloromethane, the organic layers were dried over MgSO4, filtered and the solvent was removed under vacuum. The resulting yellow oil was dissolved in toluene (100 mL). After addition of a catalytic amount of pyridinium *p*-toluenesulfonate salt (0.7 g, 0.27 mmol), the red mixture was stirred under reflux during 4h in a Dean-Stark apparatus. After evaporation of the toluene *in vaccuo*, the residue was dissolved in dichloromethane and washed with a saturated aqueous solution of NaHCO3. The organic layer was dried over MgSO4, filtered and the solvent removed. Compound **7** was obtained as a yellow microcrystalline powder (1,3 g, 74%) after recrystallisation in ethylacetate..

1H NMR (CDCl3)  :8.58 (d, *J* = 5 Hz, 2H, H6) ; 8.44 (s, 2H, H3) ; 7.40 (d, *J* = 9 Hz, 4H, H10) ; 7.36 (d, *J* = 16.3 Hz, 2H, H8) ; 7.31 (dd, *J* = 5 Hz, *J* = 1.3 Hz, 2H, H5) ; 6.86 (d, *J* = 16.3 Hz, 2H, H7) ; 6.62 (d, *J* = 9 Hz, 4H, H11) ; 3.67 (t, *J* = 6 Hz, 4H, H16) ; 3.31 (m, 8H, H13,13’) ; 1.81-1.48 (m, 12H, H14,14’,15) ; 1.45-1.24 (m, 4H, H15’) ; 0.94 (t, *J* = 7 Hz, 6H, H16’). UV-visible (CH2Cl2) : max = 398 nm; max = 54 000 L.mol-1.cm-1; HRMS (FAB) [M+H]+ calculated for C42H55N4O2 : 647.4325, (found: 647.4324). Anal. Calcd. (found) for C42H54N4O2.H2O: C, 75.87 (75.44); H, 8.49 (8.26); N, 8.43 (8.54).

**4,4’-bis[*p*-[(*N*-ethyl-*N*-2-aminoethyl)aminostyryl]-[2,2’]-bipyridine** **2a.** (i) In a Schlenk vessel, diethylazodicarboxylate (DEAD) (0.9 mL, 5.6 mmol, 2 eq) was added dropwise to a THF solution (30 mL) of 4,4’-*p*-[(*N*,*N*-dihydroxyethyl)aminostyryl]-[2,2’]-bipyridine **1a** (1.5 g, 2.8 mmol, 1 eq), phtalamide (826 mg, 5.6 mmol, 2 eq) and triphenylphosphine (1.48 g, 5.6 mmol, 2 eq). The solution was stirred overnight at room temperature, concentrated by evaporation of half of the solvent and a yellow precipitated was obtained upon addition of methanol (100 mL). The resulting yellow solid was filtered off, washed with diethylether and dried under vaccum (1.9 g, 86 %).

(ii) A THF (50 mL) solution of this phthalimide bipyridine intermediate (1 g, 1.25 mmol, 1eq) and hydrazine (0.4 mL, 12.5 mmol, 10 eq),was then heated under reflux overnight. After cooling to room temperature, the organic layer was washed with a saturated aqueous NaHCO3 solution. The THF was evaporated in vaccuo ; the crude mixture was dissolved in dichloromethane (100 mL), washed with water (2x20 mL) and dried over MgSO4. After filtration and evaporation of the solvent, **2a** was recovered as a yellow microcrystalline powder (630 mg, 94 %).

1H NMR(CDCl3)  : 8.59 (d, *J* = 5.2 Hz, 2 H, H6) ; 8.44 (s, 2 H, H3) ; 7.41 (d, *J* = 8.9 Hz, 4 H, H10) ; 7.37 (d, *J* = 16.2 Hz, 2 H, H8) ; 7.31 (dd, *J* = 4.5 Hz, *J* = 1.7 Hz, 2 H, H5) ; 6.87 (d, *J* = 16.2 Hz, 2 H, H7) ; 6.69 (d, *J* = 8.9 Hz, 4 H, H11) ; 3.48-3.35 (m, 8 H, H13,13’) ; 2.92 (t, *J* = 6.6 Hz, 4 H, H14) ; 1.16 (t, *J* = 7 Hz, 6 H, H14’).UV-visible (CH2Cl2) : max = 384 nm; max = 43000 L.mol-1.cm-1. HRMS (FAB) [M+H]+ calculated for C34H41N6 : 533.3393; (found: 533.3403).

**4,4’-bis[*p*-[(*N*-butyl-*N*-4-aminobutyl)aminostyryl]-2,2’-bipyridine** **2b.** Using the same procedure, compound **2b** was isolated as an orange microcrystalline powder in 92% yield.

1H NMR (CDCl3)  : 8.58 (d, *J* = 5 Hz, 2 H, H6) ; 8.44 (s, 2 H, H3) ; 7.40 (d, *J* = 9 Hz, 4 H, H10) ; 7.36 (d, *J* = 16.2 Hz, 2 H, H8) ; 7.31 (dd, *J* = 5 Hz ; *J* = 1.8 Hz, 2 H, H5) ; 6.86 (d, *J* = 16.2 Hz, 2 H, H7) ; 6.61 (d, *J* = 9 Hz, 4 H, H11) ; 3.40-3.23 (m, 8 H, H13,13’) ; 2.72 (t, *J* = 6.8 Hz, 4 H, H16) ; 1.71-1.27 (m, 16 H, H14,14’,15,15’) ; 0.94 (t, *J* = 6.8 Hz, 6 H, H16’). UV-visible (CH2Cl2) : max = 400 nm; max = 38 000 L.mol-1.cm-1.HRMS (FAB) [M+H]+ Calculated for C42H57N6 : 645.4645 (found: 645.4629).

**polyimide ligand 3a**. To a solution of **2a** (500 mg, 0.94 mmol, 1 eq) in 1-methyl-2-pyrrolidinone (NMP, 6 mL) was added dropwise a NMP solution (4 mL) of 6FDA (416 mg, 0.94 mmol, 1 eq) at 0°C. The mixture was then stirred for two days at room temperature. After further addition of pyridine (1.25 mL, 34 mmol, 16 eq) and acetic anhydride (3.25 mL, 34 mmol, 36 eq), the solution was heated overnight at 60 °C. The solution was then cooled to room temperature and added dropwise in diethylether (200 mL) under vigorous stirring. The resulting precipitate was filtered off, and recrystallized twice from dichloromethane (10 mL)-diethylether (200 mL) After filtration, the resulting yellow solid was dried under vaccum (690 mg, 82 %).

1H NMR (CD2Cl2)  : 8.51 (m br, 2 H, H6) ; 8.45 (s br, 2 H, H3) ; 7.78 (m, 2 H, H18) ; 7.75 (m, 4 H, H17) ; 7.40-7.20 (m,8 H, H5,8,10) ; 6.87 (d br, *J* = 16.2 Hz, 2 H, H7) ; 6.76 (d br, *J* = 8.8 Hz, 4 H, H11) ; 3.86 (m br, 4H, H14) ; 3.58 (m br, 4 H, H13) ; 3.40 (m br, 4H, H13’) ; 1.16 (m br, 6 H, H14’). 19F NMR (CD2Cl2) : - 63.9 (s); IR (KBr)  (cm-1): 1778, 1718, 744; UV-visible (CH2Cl2): max = 388 nm; Tg = 210 °C. Molecular Weight Mw = 9300, Mn = 6600 with a polydispersity of 1.40.

**Polyimide ligand 3b.** Using the same procedure, polymer **3b** was isolated as a yellow-orange powder with a 75% yield.

1H NMR (CD2Cl2) : 8.53 (d br, *J* = 5 Hz, 2 H, H6) ; 8.46 (s br, 2 H, H3 ; 7.85 (m, 2 H, H20) ; 7.77 (m, 4 H, H19) ; 7.40-7.29 (m, 8 H, H5,8,10) ; 6.86 (d br, *J* = 16.2 Hz, 2 H, H7) ; 6.61 (d, *J* = 8.9 Hz, 4 H, H11) ; 3.69 (m br, 4 H, H16) ; 3.31 (m br, 8 H, H13,13’) ; 1.78-1.42 (m, 12 H, H14,14’,15) ; 1.40-1.18 (m, 4 H, H15’) ; 0.91 (t br, *J* = 7 Hz, 6 H, H16’). RMN 19F (CD2Cl2)  : - 63.9 (s); IR (KBr)  (cm-1): 1777, 1718, 743;UV-visible (CH2Cl2) : max = 401 nm; Tg = 165 °C . Molecular Weight Mw = 19300, Mn = 14100 with a polydispersity of 1.37.

**Polyimide complex 4b.** In a Schlenk flask, a DMF (7 mL) solution of **3a** (200 mg, 0.19 mmol, 1 eq) and Ru(DBASbpy)2Cl2 (266 mg, 0.19 mmol, 1eq) was heated under reflux for 6 h. The dark-red solution was cooled down to room temperature and [HNBu3][TRISPHAT] (362 mg, 0.76 mmol, 4 eq) was added. After 30 min of stirring, a dark-red precipitate was obtained by addition of water (120 mL). The product was filtered off and washed successively with water and diethylether. After recrystallisation from dichloromethane-diethylether and filtration, **4b** was recovered as a dark-red powder (536 mg, 92 %).

1H NMR (CD2Cl2)  : 8.44 (s br, 6 H, H3) ; 8.02 (m br,6 H, H6) ; 7.90-7.72 (m, 6 H, H19,20) ; 7.42-7.10 (m, 24 H, H5,8,10) ; 6.6 (m br, 18 H, H7,11) ; 3.73 (m br, 4 H, H16) ; 3.37 (m br, 8 H, H13,13’) ; 1.78-1.42 (m, 12 H, H14,14’,15) ; 1.40-1.18 (m, 4 H, H15’) ; 0.91 (t br, *J* = 7 Hz, 6 H, H16’). 19F NMR (CD2Cl2)  : - 63.9 (s). 31P NMR (CD2Cl2)  : -80.5 (s); IR (KBr)  (cm-1): 1777, 1718, 743; UV-visible (CH2Cl2) : max = 445 – 513 nm.
